# Supplementary material
Source: PubMed Central journal article supplement (PMC3751977)
Supplement: NIHMS417069-supplement-01.pdf [file NIHMS417069-supplement-01.pdf]

## SUPPLEMENTAL MATERIAL

### Supplementary Appendix Methods

All biomarkers reported here have been measured previously and the analytical methods described: fructosamine (1), N-terminal pro-B-type natriuretic peptide (NT-pro BNP) (1), lymphotoxin  $\beta$  receptor (LT $\beta$ R) (2), and soluble endothelial cell-selective adhesion molecule (sESAM) (3), soluble intercellular adhesion molecule (sICAM) (3), soluble vascular cell adhesion molecule (sVCAM) (3), myeloperoxidase (MPO)(4), matrix metalloproteinase-9 (MMP-9) (4), tumor necrosis factor receptor alpha-1 (TNFR1A)(4), peptidoglycan recognition protein-1(PGYLRP-1) (5), soluble receptor for advanced glycation end products (sRAGE) (6), soluble CD40 ligand (sCD40L) (7), growth differentiation factor-15 (GDF-15) (8), cystatin C (9), osteoprotegerin (OPG) (10), monocyte chemoattractant protein-1 (MCP-1) (11), B-type natriuretic peptide (BNP) (12), interleukin-18 (IL-18) (13), lipoprotein-associated phospholipase A2 activity (LP-PLA2) (14), highly-sensitive troponin T (cTnT) (15), caspase-3 (16), CCL11 (17), CXCL1 (17), and CXCL2 (17).

**Supplementary Appendix Table 1.** Baseline Characteristics of Participants in the Entire Cohort (n=1200) Stratified by Inclusion or Exclusion in the Analysis of Biomarkers and Lipoproteins (n=942)

| <b>Variable</b>                      | <b>Excluded (n=258)</b> | <b>Included (n=942)</b> | <b>p-value</b> |
|--------------------------------------|-------------------------|-------------------------|----------------|
| Age (yrs)                            | 51 (45, 58)             | 42 (35, 50)             | <0.0001        |
| Men                                  | 36%                     | 38%                     | 0.52           |
| White                                | 25%                     | 25%                     | 0.87           |
| Body Mass Index (kg/m <sup>2</sup> ) | 35.2 (32.6, 39.7)       | 34.8 (32.0, 38.8)       | 0.09           |
| Total Body Fat (%)                   | 0.41 (0.32, 0.44)       | 0.39 (0.30, 0.44)       | 0.09           |
| Subcutaneous Adipose Tissue (kg)     | 7.1 (5.5, 9.5)          | 6.5 (4.9, 8.7)          | 0.003          |
| Visceral Adipose Tissue (kg)         | 1.7 (1.4, 2.1)          | 1.6 (1.2, 2.0)          | 0.01           |
| Hypertension                         | 68%                     | 36%                     | <0.0001        |
| Diabetes                             | 50%                     | 8%                      | <0.0001        |
| Low HDL Cholesterol                  | 50%                     | 52%                     | 0.62           |
| Metabolic Syndrome                   | 75%                     | 51%                     | <0.0001        |

Data are presented as median (25<sup>th</sup>, 75<sup>th</sup> percentile) or proportion (%) where appropriate

**Supplementary Appendix Table 2.** Unadjusted Spearman Correlation Coefficients between VAT/BSA or SAT/BSA and Biomarkers

| <b>Variable</b>            | <b>VAT/BSA</b> | <b>SAT/BSA</b> |
|----------------------------|----------------|----------------|
| <i>Demographics</i>        |                |                |
| Age (years)                | 0.25*          | -0.03          |
| BMI (kg/m <sup>2</sup> )   | -0.02          | 0.69*          |
| Waist Circumference (cm)   | 0.28*          | 0.44*          |
| Hip Circumference (cm)     | -0.16*         | 0.73*          |
| Waist/Hip ratio            | 0.53*          | -0.33*         |
| <i>DEXA Fat Measures</i>   |                |                |
| Fat Mass (kg)              | -0.15*         | 0.80*          |
| Lean Mass (kg)             | 0.24*          | -0.37*         |
| Total Body Fat (%)         | -0.23*         | 0.81*          |
| Lower Fat (kg)             | -0.39*         | 0.68*          |
| Truncal Fat (kg)           | 0.07           | 0.76*          |
| <i>Insulin Resistance</i>  |                |                |
| Glucose (mg/dL)            | 0.26*          | 0.002          |
| Insulin (μU/mL)            | 0.17*          | 0.18*          |
| HOMA-IR                    | 0.23*          | 0.17*          |
| Fructosamine (μmol/L)      | 0.10*          | -0.22*         |
| <i>Adipokines</i>          |                |                |
| Leptin (μg/L)              | -0.29*         | 0.73*          |
| Adiponectin (ng/mL)        | -0.13*         | 0.11*          |
| <i>Lipids</i>              |                |                |
| Total Cholesterol (mg/dL)  | 0.13*          | -0.05          |
| LDL-C (mg/dL)              | 0.08           | -0.01          |
| LDL particle no. (nmol/L)  | 0.25*          | -0.13*         |
| LDL size (nm)              | -0.34*         | 0.26*          |
| Triglycerides (mg/dL)      | 0.35*          | -0.18*         |
| VLDL particle no. (nmol/L) | 0.32*          | -0.20*         |
| VLDL size (nm)             | 0.15*          | -0.02          |
| HDL-C (mg/dL)              | -0.26*         | 0.17*          |
| HDL particle no. (μmol/L)  | -0.003         | 0.12*          |
| HDL size (nm)              | -0.33*         | 0.22*          |
| <i>Inflammation</i>        |                |                |
| hs-CRP (mg/L)              | -0.02          | 0.42*          |
| OPG (ng/mL)                | -0.02          | 0.16*          |
| MCP-1 (pg/mL)              | 0.08           | 0.06           |
| MMP-9 (ng/mL)              | -0.004         | 0.07           |
| CCL11 (pg/mL)              | 0.12*          | -0.12*         |
| CXCL1 (ng/mL)              | -0.06          | 0.08           |
| CXCL2 (ng/mL)              | -0.05          | 0.03           |
| LTBR (ng/mL)               | 0.06           | 0.19*          |
| PGLYP-1 (ng/mL)            | 0.10           | 0.16*          |

| Variable                              | VAT/BSA | SAT/BSA |
|---------------------------------------|---------|---------|
| MPO (ng/mL)                           | 0.03    | 0.06    |
| IL-18 (ng/mL)                         | 0.14*   | -0.04   |
| GDF-15m(ng/mL)                        | 0.18*   | -0.002  |
| LP-PLA2 activity (nmol/min/ml)        | 0.28*   | -0.28*  |
| TNFR1A (ng/mL)                        | 0.08    | 0.05    |
| sRAGE (ng/mL)                         | 0.06    | -0.08   |
| <i>Endothelial Function</i>           |         |         |
| sESAM (ng/mL)                         | 0.15*   | 0.11*   |
| sVCAM (ng/mL)                         | 0.06    | 0.02    |
| sICAM (ng/mL)                         | 0.04    | 0.00    |
| <i>Cardiac Structure and Function</i> |         |         |
| cTnT (ng/mL)                          | 0.18*   | -0.18*  |
| BNP (pg/mL)                           | -0.07   | 0.10*   |
| NT-Pro BNP (pg/mL)                    | -0.09   | 0.18*   |
| <i>Thrombosis</i>                     |         |         |
| D-Dimer (ng/mL)                       | -0.16*  | 0.28*   |
| sCD40L (ng/mL)                        | 0.06    | -0.05   |
| <i>Renal Function</i>                 |         |         |
| eGFR (ml/min/1.73 m2)                 | -0.10*  | 0.13*   |
| CystatinC (mg/L)                      | 0.16*   | 0.04    |
| <i>Miscellaneous</i>                  |         |         |
| Caspase-3 (ng/mL)                     | -0.01   | 0.11*   |
| Uric Acid (mg/L)                      | 0.28*   | -0.21*  |
| Liver Fat (%)                         | 0.40*   | 0.03    |
| <i>Atherosclerosis</i>                |         |         |
| CAC (Agatston units)                  | 0.25*   | -0.07   |
| APB (%)                               | 0.21*   | -0.08   |
| AWT (mm)                              | 0.30*   | -0.13*  |

\*  $p < 0.0016$

Abbreviations: APB, aortic plaque burden; AWT, aortic wall thickness; BMI, body-mass index; BNP, B-type natriuretic peptide; BSA, body surface area; CAC, coronary artery calcium; CCL11, chemokine (c-c motif) ligand 11; cTnT, highly sensitive cardiac troponin T; CXCL1, chemokine (c-x-c motif) 1; CXCL2, chemokine (c-x-c motif) 2; eGFR, estimated glomerular filtration rate; GDF-15, growth differentiation factor-15; HDL-C, high-density lipoprotein cholesterol; hs-CRP, high-sensitivity C-reactive protein; HOMA-IR, homeostasis model assessment of insulin resistance; IL-18, interleukin 18; LDL-C, low-density lipoprotein cholesterol; LP-PLA2, lipoprotein-associated phospholipase A2; LT $\beta$ R, lymphotoxin  $\beta$  receptor; MCP-1, monocyte chemoattractant protein-1; MMP-9, matrix metalloproteinase-9; MPO, myeloperoxidase; NT-Pro BNP, N-terminal Pro-B-type natriuretic peptide; OPG, osteoprotegerin; PGLYRP-1, peptidoglycan recognition protein-1; SAT, subcutaneous adipose tissue; sCD40L, soluble CD40 Ligand; sESAM, soluble endothelial cell-selective molecule; sICAM, soluble intracellular adhesion molecule; sRAGE, soluble receptor for advanced glycation end products; sVCAM, soluble vascular cell adhesion molecule; TNFR1A, tumor necrosis factor alpha-1 receptor; VAT, visceral adipose tissue

**Supplementary Appendix Table 3.** Multivariable-Adjusted Linear Regression Models of Relation of VAT or SAT to Other Biomarkers: Standardized  $\beta$  coefficient of VAT/BSA or SAT/BSA

| <b>Variable</b>                       | <b>VAT/BSA</b> | <b>SAT/BSA</b> |
|---------------------------------------|----------------|----------------|
| <i>Inflammation</i>                   |                |                |
| OPG (ng/mL)                           | 0.07           | 0.09           |
| MCP-1 (pg/mL)                         | 0.02           | 0.10           |
| MMP-9 (ng/mL)                         | 0.07           | 0.03           |
| CCL11 (pg/mL)                         | -0.01          | -0.20          |
| CXCL1 (ng/mL)                         | -0.05          | -0.01          |
| CXCL2 (ng/mL)                         | -0.02          | -0.02          |
| PGLYP-1 (ng/mL)                       | 0.11           | 0.15           |
| MPO (ng/mL)                           | 0.07           | 0.05           |
| IL-18 (ng/mL)                         | 0.004          | 0.15           |
| GDF-15m(ng/mL)                        | 0.02           | 0.03           |
| LP-PLA2 activity (nmol/min/ml)        | 0.08           | -0.01          |
| TNFR1A (ng/mL)                        | 0.03           | 0.11           |
| sRAGE (ng/mL)                         | -0.05          | -0.16          |
| <i>Endothelial Function</i>           |                |                |
| sVCAM (ng/mL)                         | 0.04           | 0.03           |
| sICAM (ng/mL)                         | -0.01          | -0.04          |
| <i>Cardiac Structure and Function</i> |                |                |
| cTnT (ng/mL)                          | -0.02          | -0.04          |
| BNP (pg/mL)                           | -0.09          | 0.09           |
| NT-Pro BNP (pg/mL)                    | -0.07          | 0.09           |
| <i>Thrombosis</i>                     |                |                |
| D-Dimer (ng/mL)                       | 0.02           | 0.10           |
| sCD40L (ng/mL)                        | 0.03           | 0.03           |
| <i>Renal Function</i>                 |                |                |
| eGFR (ml/min/1.73 m <sup>2</sup> )    | 0.09           | 0.07           |
| CystatinC (mg/L)                      | -0.02          | 0.13           |
| <i>Miscellaneous</i>                  |                |                |
| Caspase-3 (ng/mL)                     | 0.11           | 0.11           |
| Uric Acid (mg/L)                      | 0.09           | 0.08           |

\*  $p < 0.0016$ 

Model adjusted for age + sex + race + menopausal status (women only) + BMI+ VAT/BSA + SAT/BSA

Data presented are  $\beta$  coefficients that represent the estimated unit change in 1 standard deviation of the log-transformed biomarker for a 1 standard deviation increase in the fat parameter.

Abbreviations same as in Supplementary Appendix Table 2

## Supplementary Appendix Figure 1. Subject Selection Diagram

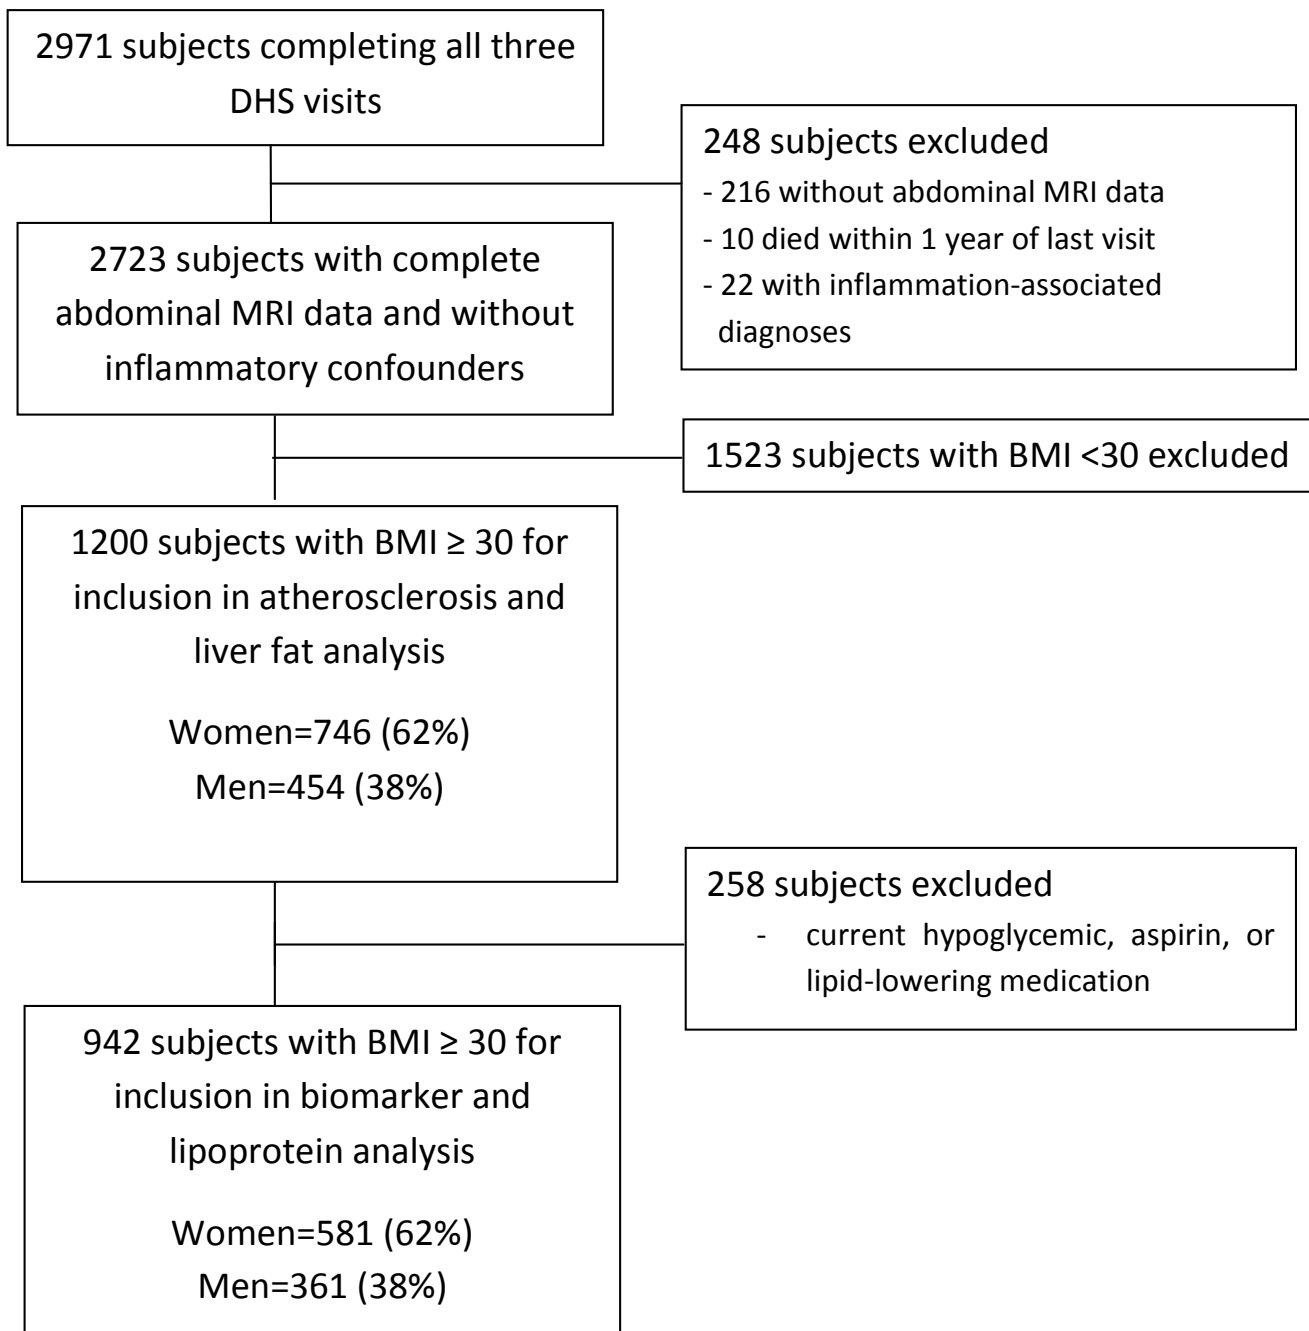

BMI, body mass index; DHS, Dallas Heart Study; MRI, magnetic resonance imaging

Supplementary Appendix Figure 2. VAT and SAT by Race in Obese Adults

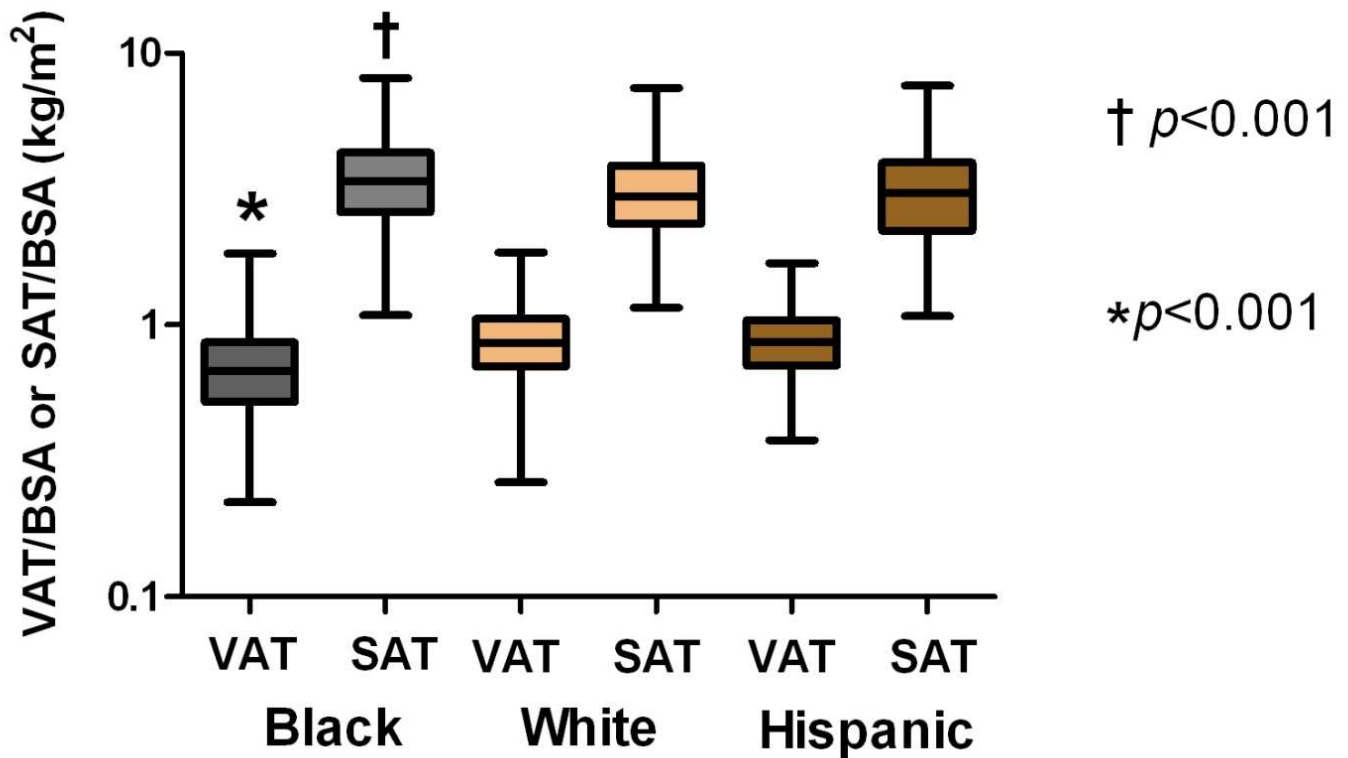

Box-and-whiskers plot represents median value, 25<sup>th</sup> and 75<sup>th</sup> percentile, and maximum/minimum values for VAT/BSA or SAT/BSA

\**p*-value for Wilcoxon rank-sum test for comparisons of VAT between Black and White and Black and Hispanic  
 †*p*-value for Wilcoxon rank-sum test for comparisons of SAT between Black and White and Black and Hispanic

BSA, body surface area; SAT, subcutaneous adipose tissue; VAT, visceral adipose tissue

## Supplementary References

1. Abdullah SM, Khera A, Das SR, et al. Relation of coronary atherosclerosis determined by electron beam computed tomography and plasma levels of n-terminal pro-brain natriuretic peptide in a multiethnic population-based sample (the Dallas Heart Study). *Am J Cardiol* 2005;96:1284-9.
2. Owens AW, Matulevicius S, Rohatgi A, et al. Circulating lymphotoxin beta receptor and atherosclerosis: observations from the Dallas Heart Study. *Atherosclerosis* 2010;212:601-6.
3. Rohatgi A, Owens AW, Khera A, et al. Differential associations between soluble cellular adhesion molecules and atherosclerosis in the Dallas Heart Study: a distinct role for soluble endothelial cell-selective adhesion molecule. *Arterioscler Thromb Vasc Biol* 2009;29:1684-90.
4. Nguyen AB, Rohatgi A, Garcia CK, et al. Interactions between smoking, pulmonary surfactant protein B, and atherosclerosis in the general population: the dallas heart study. *Arterioscler Thromb Vasc Biol* 2011;31:2136-43.
5. Rohatgi A, Ayers CR, Khera A, et al. The association between peptidoglycan recognition protein-1 and coronary and peripheral atherosclerosis: Observations from the Dallas Heart Study. *Atherosclerosis* 2009;203:569-75.
6. Lindsey JB, de Lemos JA, Cipollone F, et al. Association between circulating soluble receptor for advanced glycation end products and atherosclerosis: observations from the Dallas Heart Study. *Diabetes Care* 2009;32:1218-20.
7. de Lemos JA, Zirlik A, Schonbeck U, et al. Associations between soluble CD40 ligand, atherosclerosis risk factors, and subclinical atherosclerosis: results from the Dallas Heart Study. *Arterioscler Thromb Vasc Biol* 2005;25:2192-6.
8. Rohatgi A, Patel P, Das SR, et al. Association of growth differentiation factor-15 with coronary atherosclerosis and mortality in a young, multiethnic population: observations from the Dallas Heart Study. *Clin Chem* 2012;58:172-82.
9. Patel PC, Ayers CR, Murphy SA, et al. Association of cystatin C with left ventricular structure and function: the Dallas Heart Study. *Circ Heart Fail* 2009;2:98-104.



10. Abedin M, Omland T, Ueland T, et al. Relation of osteoprotegerin to coronary calcium and aortic plaque (from the Dallas Heart Study). *Am J Cardiol* 2007;99:513-8.
11. Deo R, Khera A, McGuire DK, et al. Association among plasma levels of monocyte chemoattractant protein-1, traditional cardiovascular risk factors, and subclinical atherosclerosis. *J Am Coll Cardiol* 2004;44:1812-8.
12. Das SR, Abdullah SM, Leonard D, et al. Association between renal function and circulating levels of natriuretic peptides (from the Dallas Heart Study). *Am J Cardiol* 2008;102:1394-8.
13. Zirlik A, Abdullah SM, Gerdes N, et al. Interleukin-18, the metabolic syndrome, and subclinical atherosclerosis: results from the Dallas Heart Study. *Arterioscler Thromb Vasc Biol* 2007;27:2043-9.
14. Brilakis ES, Khera A, Saeed B, et al. Association of lipoprotein-associated phospholipase A2 mass and activity with coronary and aortic atherosclerosis: findings from the Dallas Heart Study. *Clin Chem* 2008;54:1975-81.
15. de Lemos JA, Drazner MH, Omland T, et al. Association of troponin T detected with a highly sensitive assay and cardiac structure and mortality risk in the general population. *JAMA* 2010;304:2503-12.
16. Matulevicius S, Rohatgi A, Khera A, et al. The association between plasma caspase-3, atherosclerosis, and vascular function in the Dallas Heart Study. *Apoptosis* 2008;13:1281-9.
17. Castillo L, Rohatgi A, Ayers CR, et al. Associations of four circulating chemokines with multiple atherosclerosis phenotypes in a large population-based sample: results from the Dallas Heart Study. *J Interferon Cytokine Res* 2010;30:339-47.
